# Supplementary material
Source: HighWire-hosted journal article supplement (https://bmjopen.bmj.com/content/14/5/e085044)
Supplement: inline-supplementary-material-1 [file inline-supplementary-material-1.pdf]

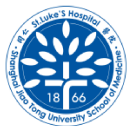

上海市同仁医院

SHANGHAI TONG REN HOSPITAL

V2.0 2023.09.28

## 知情同意书

### 受试者须知页

方案名称：被动抬腿体位对肥胖患者右颈内静脉横截面积的影响

主要研究者：裴东亮

申办方：上海市同仁医院

尊敬的受试者：

您正在被邀请参加一项名为“被动抬腿体位对肥胖患者右颈内静脉横截面积的影响”的研究。在签署知情同意书前,请仔细阅读以下信息:请仔细阅读本知情同意书并慎重做出是否参加本项研究的决定。参加这项研究完全是您自主的选择。作为受试者,您必须在加入临床研究前给出您的书面同意书。当您的研究医生或者研究人员和您讨论知情同意书的时候,您可以让他/她给您详细解释知情同意书的各项内容。您可以在做出参与此项研究的决定之前,和您的家人及朋友进行充分讨论。您有权拒绝参加本研究,也可随时退出研究;您不会因此而受到处罚,也不会失去您应有的权利。若您正在参加别的研究,请告知您的研究医生或者研究人员。本研究的背景、目的、研究过程及其他重要信息如下:

#### 一、研究背景

右颈内静脉穿刺置管是临床中常用的操作,对于肥胖的外科患者来说,静脉通路是一个重要问题,尤其重大手术需要中心静脉导管,其准确且迅速完成右颈内静脉穿刺置管对手术的顺利进行至关重要。但目前大多数评估此类操作对 IJV CSA 影响的研究都是在非肥胖患者中进行的。但在肥胖患者中的有效性和安全性仍在争论中。

#### 二、研究目的

观察 PLR 对肥胖患者右颈内静脉 CSA 的影响,为肥胖患者右颈内静脉穿刺置管提供依据。

#### 三、研究过程

1. 40 人会在本院参与本研究。

##### 2. 研究步骤

a. 研究人员获取麻醉医生在常规手术前麻醉访视和手术后访视评估材料(非常简短)

b. 进入手术室后,工作人员会抬起您的双腿,大概持续 2 分钟,然后超声测量右颈内静脉。放下双腿后再次测量。

##### 3. 这项研究会持续多久?

大概持续 4~5 分钟。本研究不会增加您的手术或麻醉风险,也不会增加医疗费用和住院天数。

##### 4. 研究中收集的信息和生物标本

您的所有研究记录将被匿名化,个人信息将被严格保密。研究结果仅以统计学方式呈现。

#### 四、风险与受益

本研究不会增加您的手术或麻醉风险,也不会增加血液检测项目。参与研究也不会影响您的待遇。您的参与有助于提高右颈内静脉穿刺置管的技术发展和提高。

#### 五、研究结果的使用和个人信息的保密

在您和其他受试者的理解和协助下,通过本项目研究的结果可能会在医学杂志上发表,但是我们会按照法律的要求为您的研究记录保密。研究受试者的个人信息将受到严格保密,除非应相关法律要求,您的个人信息不会被泄露。必要时,政府管理部门和医院伦理委员会及其它相关研究人员可以按规定查阅您的资料。

#### 七、关于研究费用及相关补偿

##### 1. 研究所用的药物及相关检查费用

本研究不会干预您的诊疗过程。参加本研究不会额外增加您的医疗开支和医疗风险,也不会增加您的住院天数、康复周期等。



# 上海市同仁医院

SHANGHAI TONG REN HOSPITAL

V2.02023.09.28

## 2. 参加研究的补偿

参与本研究不会给您带来额外的花费，因此没有额外的补偿。

## 3. 发生损伤后的补偿/赔偿

参加研究不会增加麻醉手术风险，因此也不涉及赔偿。

## 八、受试者的权利和相关注意事项

### 1. 您的权利

参加研究的整个过程您都是自愿的；如果您决定不参加本研究，不会影响您应该得到的其他治疗。如果您决定参加，会要求您在这份书面知情同意书上签字。您有权在试验的任何阶段随时退出试验而不会遭到歧视或受到不公平的待遇，您相应的医疗待遇与权益不受影响。

### 2. 注意事项

作为受试者，您需要提供有关自身病史和当前身体状况的真实情况；告诉研究医生自己最近是否将参加其他研究，或目前正参加其他研究。

## 九、获知信息的相关联系方式

如果在研究过程中有任何重要的新信息可能影响您继续参加研究的意愿时，您的医生将会及时通知您。您可以在任何时间提出有关本项研究的任何问题，包括您自己的研究数据或项目完成后本研究的发现，并得到相应的解答，请通过电话 18017337069 与裴东亮医生联系。如果不能解决您的问题，请联系上海同仁医院伦理审查委员会，电话：02152039999-76213

### 受试者签字页

知情同意声明：

我已被告知此项研究的目的、背景、过程、风险及获益等情况。我有足够的时间和机会进行提问，问题的答复我很满意。

我也被告知，当我有问题、想反映困难、顾虑、对研究的建议，或想进一步获得信息，或为研究提供帮助时，应当与谁联系。

我已经阅读这份知情同意书，并且同意参加本研究。

我知道我可以选择不参加此项研究，或在研究期间的任何时候无需任何理由退出本研究。

我已知道如果我的状况更差了，或者我出现严重的不良事件，或者我的研究医生觉得继续参加研究不符合我的最佳利益，他/她会决定让我退出研究。无需征得我的同意，资助方或者监管机构也可能在研究期间终止研究。如果发生该情况，医生将及时通知我，研究医生也会与我讨论我的其他选择。

受试者签名：

日期：

法定代表人签字：

日期：

研究者签名：

日期：

（注：如果受试者无行为能力/限制行为能力时，则需法定代表人签名和签署日期）
